# Supplementary material for: Integration of p-type β-In2S3 thin films on III-nitride heterostructures for multiple functional applications
Source: Royal Society of Chemistry journal article supplement (doi:10.1039/c6ra22548a), 2016-01-01
Supplement: c6ra22548a1.pdf [file c6ra22548a1.pdf]

## Supplementary Information for

### Integration of p-type $\beta$ - $\text{In}_2\text{S}_3$ thin films on III-nitride heterostructures for multiple functional applications

Hongfei Liu,<sup>1)</sup> Qingqing Dou, and Chin sheng Chua

*Institute of Materials Research and Engineering (IMRE), A\*STAR (Agency for Science, Technology and Research), 2 Fusionopolis Way, Singapore 138634, Singapore*

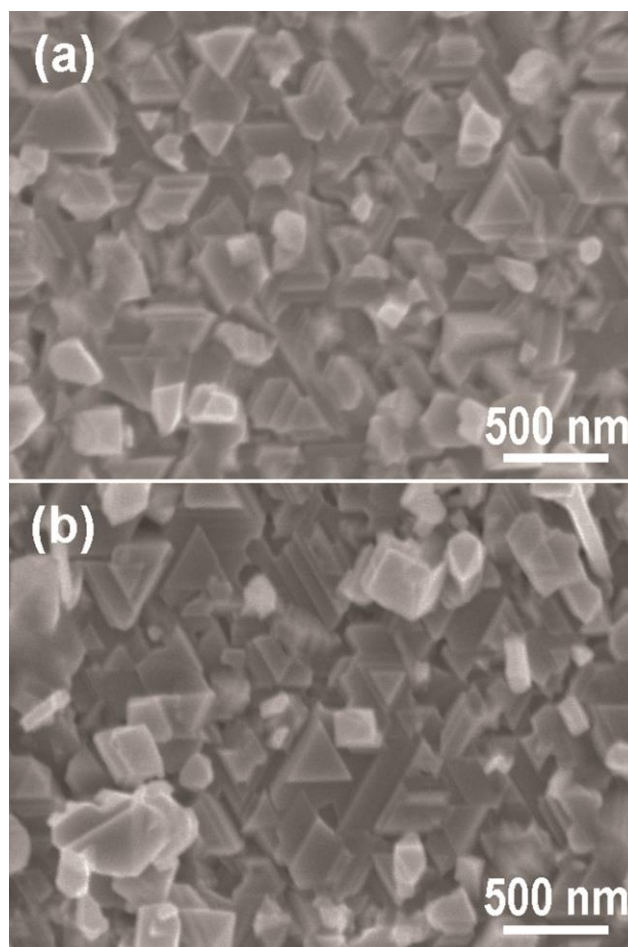

**Figure S1** Typical SEM images recorded from InN thin films after thermal vapor sulfurization (TVS) at 700 °C (a) and 750 °C (b). The surfaces exhibit triangular facet structures without any distinguishable differences between (a) and (b).

---

<sup>1)</sup> Author to whom correspondence should be addressed; electronic mail: [liuhf@imre.a-star.edu.sg](mailto:liuhf@imre.a-star.edu.sg)

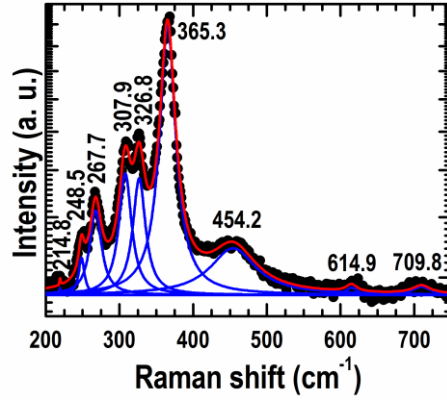

**Figure S2** Raman-scattering spectrum and its feature fittings of InN thin film after thermal vapor sulfurization (TVS) at 700 °C. The spectrum was collected at room temperature using a 325-nm laser excitation.

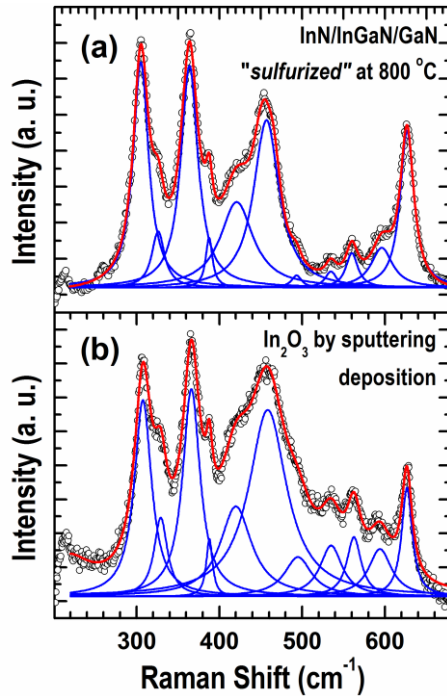

**Figure S3** Raman spectra and their feature fittings: (a) InN thin film after thermal vapor sulfurization (TVS) at 800 °C and (b) In<sub>2</sub>O<sub>3</sub> thin film deposited by magnetron-sputtering on GaAs (111) substrate at 350 °C (the deposition parameters can be found in Ref. 1). The similarity between the Raman spectra indicates an InN-to-In<sub>2</sub>O<sub>3</sub> phase conversion occurred at  $T = 800$  °C.

<sup>1</sup> H. F. Liu, G. X. Hu, H. Gong. Growth mechanism and optical properties of In<sub>2</sub>O<sub>3</sub> nanorods synthesized on ZnO/GaAs (111) substrate. *J. Cryst. Growth*, **311**, 268 (2009).

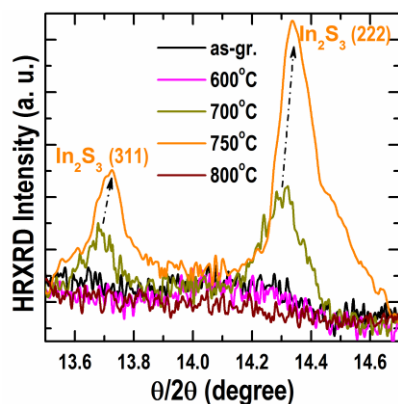

**Figure S4** HRXRD  $\theta/2\theta$  scanning patterns of InN thin film before and after thermal vapor sulfurization (TVS) at various temperature for 30 min; the patterns cover the diffractions from  $\beta$ - $\text{In}_2\text{S}_3$  (311) and (222) (JCPDS 65-0459) atomic planes. It is seen that the  $\beta$ - $\text{In}_2\text{S}_3$  (311) and (222) diffractions appeared at  $T = 700$  °C, increased and shifted to larger angles at  $T = 750$  °C (indicated by the arrows), and disappeared at  $T = 800$  °C.

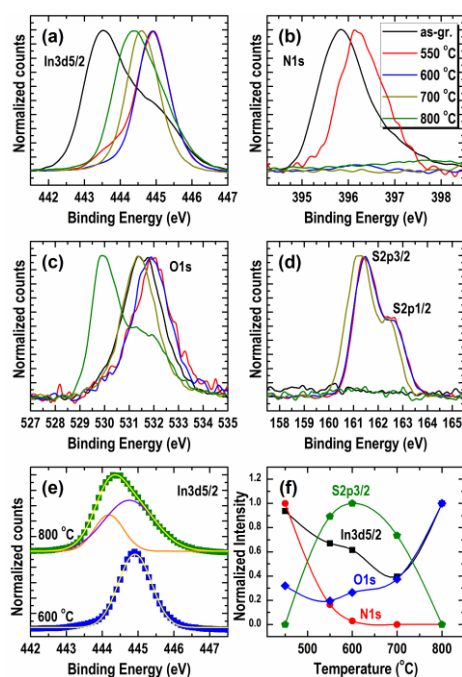

**Figure S5** High-resolution XPS spectra of (a)  $\text{In}3d_{5/2}$ , (b)  $\text{N}1s$ , (c)  $\text{O}1s$ , (d)  $\text{S}2p$ , (e) comparison of  $\text{In}3d_{5/2}$  for the samples after thermal vapor sulfurization (TVS) at 600 and 800 °C, and (f) peak intensity evolutions of  $\text{N}1s$ ,  $\text{O}1s$ ,  $\text{In}3d_{5/2}$ , and  $\text{S}2p_{3/2}$  as a function of TVS temperature. Please note the disappearance of  $\text{N}1s$  at  $T \geq 600$  °C, indicating the surface passivation, rather than phase conversion, of InN at lower TVS temperatures.

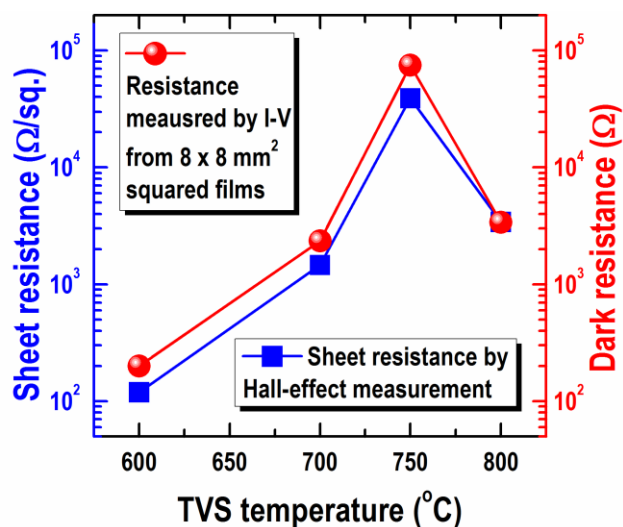

**Figure S6** Correlation between sheet resistances measured by the Hall-effect method and dark-resistances of TVS-treated InN thin film samples; the dark-resistances were measured by I-V profiling from squared film of about  $8 \times 8 \text{ mm}^2$ .

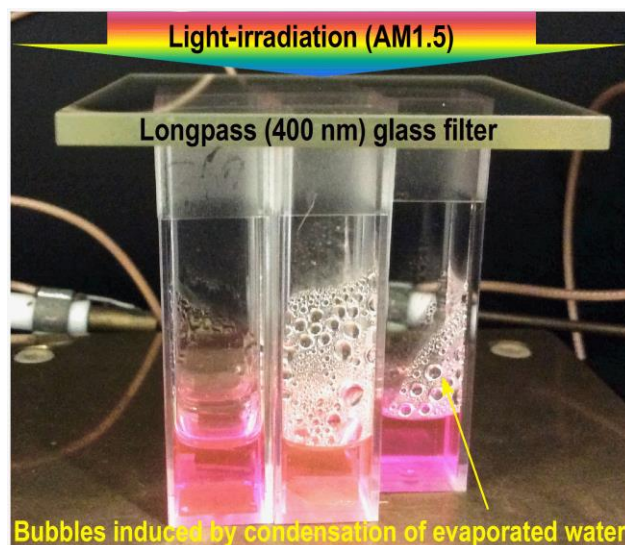

**Figure S7** Photocatalytic reaction of RhB aqueous (1 ml,  $2 \times 10^{-5} \text{ M}$ ) with and without the TVS-treated thin solid films. Bubbles induced by condensation of evaporated water are clearly seen on the inner wall of the cuvettes.
